# Supplementary material for: Inter-Species Redox Coupling by Flavin Reductases and FMN-Dependent Two-Component Monooxygenases Undertaking Nucleophilic Baeyer–Villiger Biooxygenations
Source: MDPI journal article supplement (doi:10.3390/microorganisms11010071), 2022-12-27
Supplement: s1 [file s1]

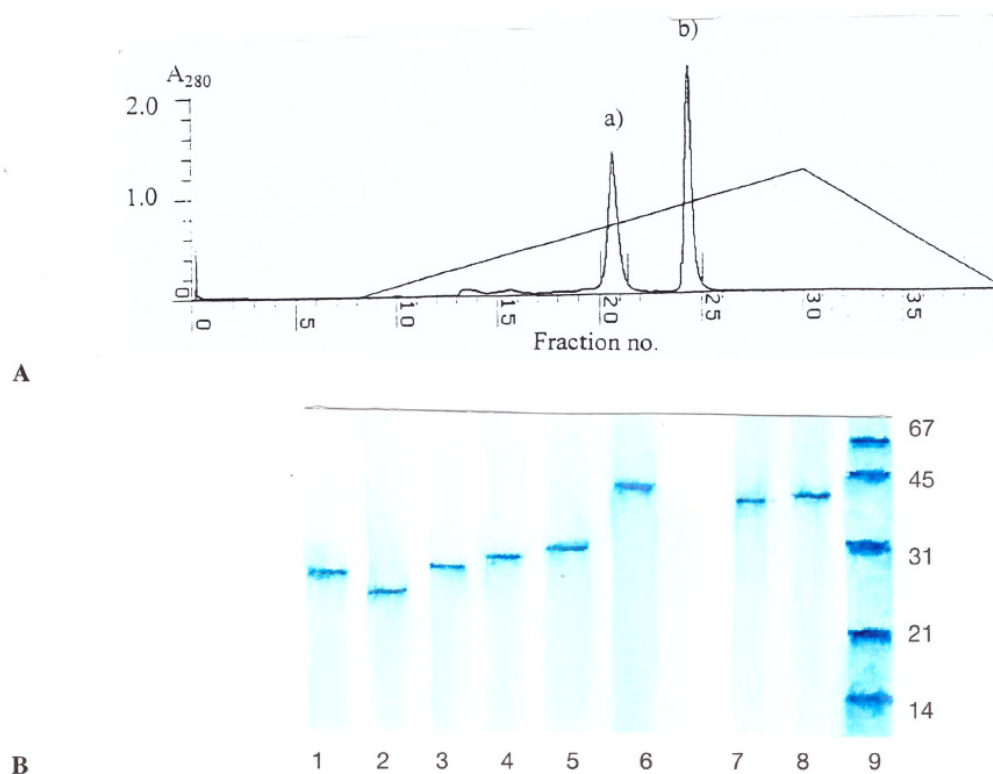

**Supplementary Figure S1A and B.** Final step purifications of both tested DKCMO isoenzymes, and all tested FRs. (A):  $A_{280}$  trace of the 2,5-DKCMO (a) and 3,6-DKCMO (b) oxygenating subunits after being loaded onto an FPLC Mono-Q column and eluted with a linear gradient of 0–0.6 M KCl in 21 mM phosphate buffer pH 7.1 as the final step purification. (B): SDS-PAGE showing purification of each of the FRs.

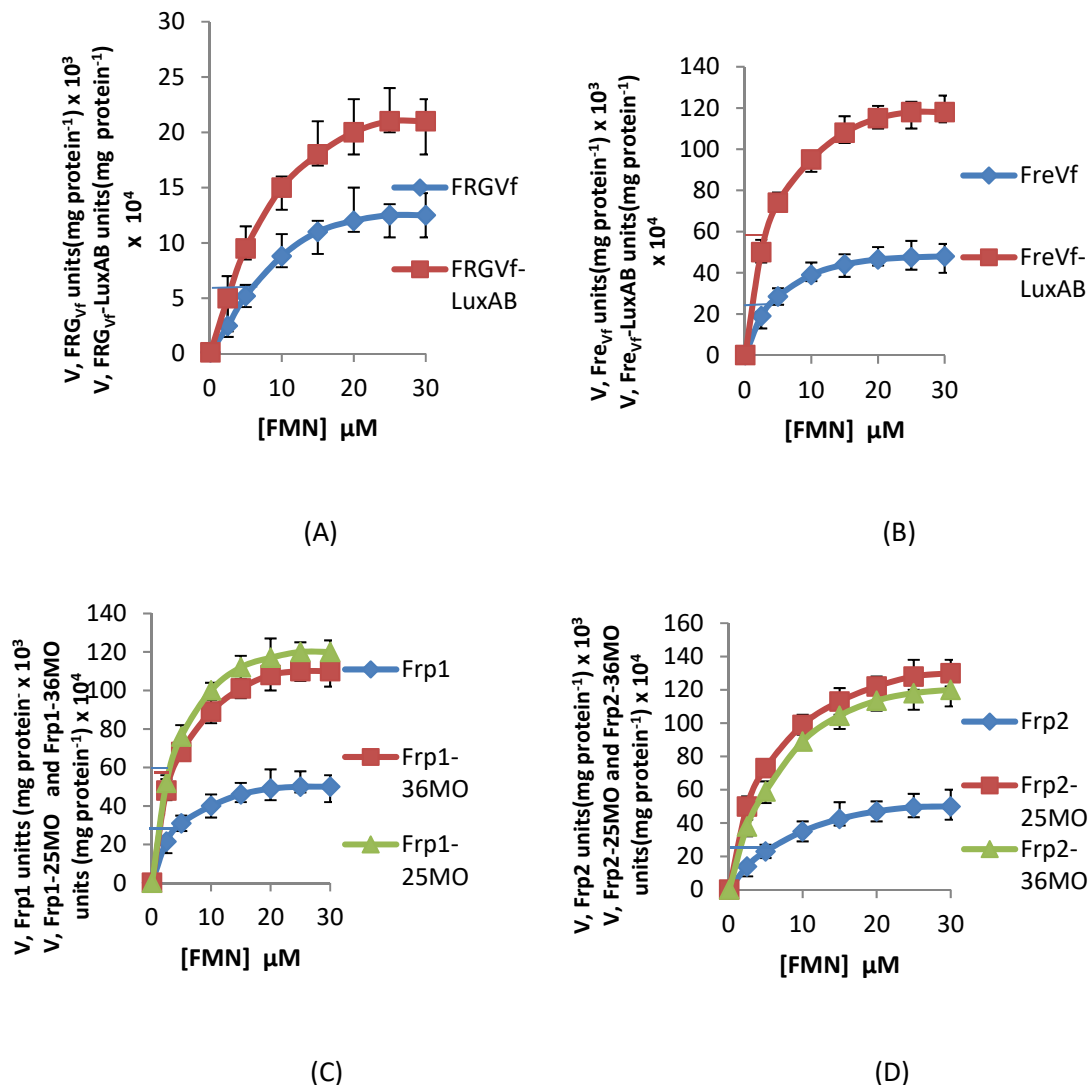

**Supplementary Figure S2A-D.** Michaelis-Menten plots of the kinetic data for the studied complementary single-enzyme and coupled -enzyme assays.

(A). Plotted data for FRGVf after assay alone (single-enzyme assays) or in combination with highly purified LuxAB luciferase (coupled-enzyme assay).

(B). Plotted data for FreVf after assay alone (single-enzyme assays) or in combination with highly purified LuxAB luciferase (coupled-enzyme assay).

(C). Plotted data for Frp1 after assay alone (single-enzyme assays) or in combination with either highly purified 2,5-DKCMO or 3,6-DKCMO (coupled-enzyme assays).

(D). Plotted data for Frp2 after assay alone (single-enzyme assays) or in combination with either highly purified 2,5-DKCMO or 3,6-DKCMO (coupled-enzyme assays).

In each case the value of  $v$  asymptotically approached the corresponding  $V_{\text{max}}$  value.
